# Supplementary material
Source: PubMed Central journal article supplement (PMC8364499)

**Mendoza Sanchez *et al.***  
**Raw western blots of all replicates; Fig.2B**

Human islet #1

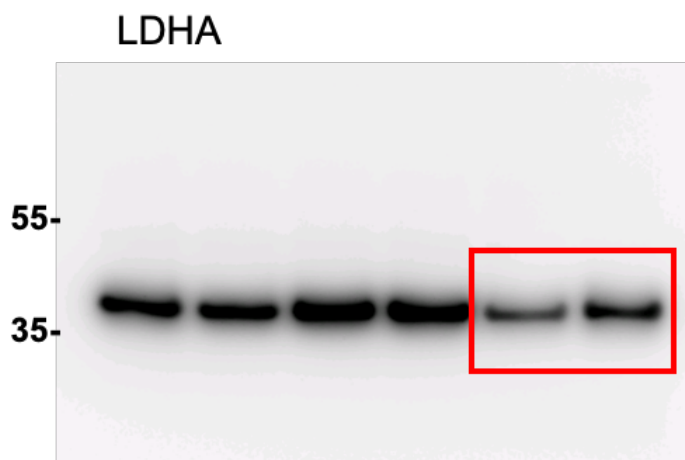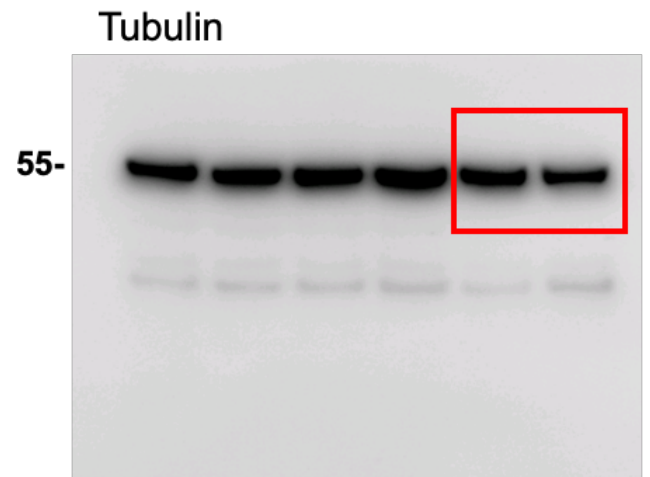

Human islet #2

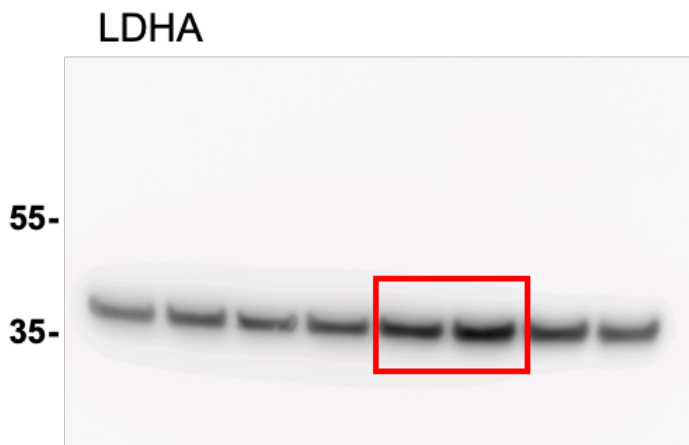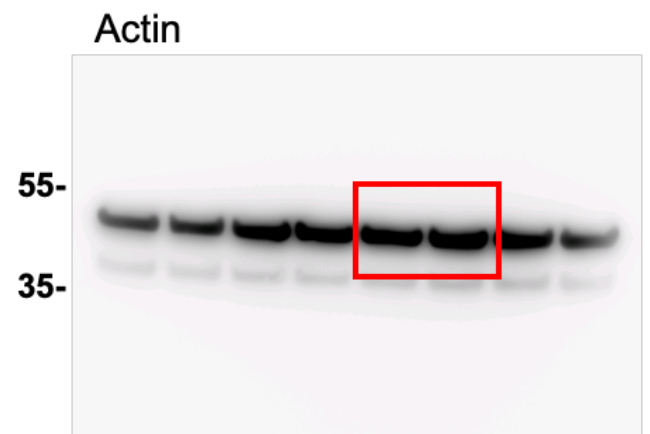

Human islet #3

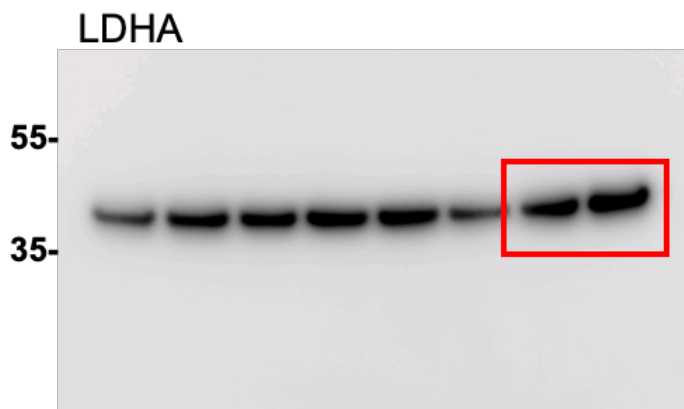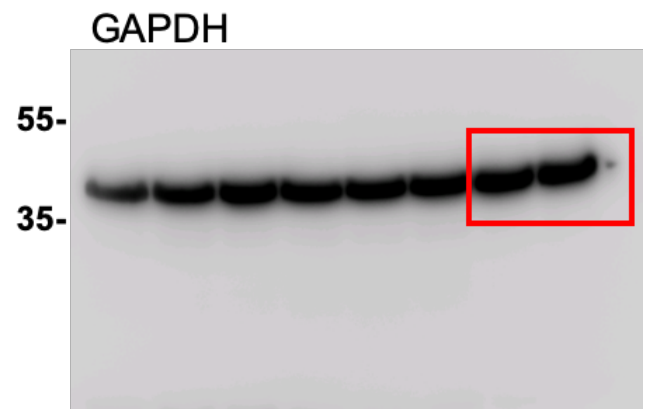

Supplement: NIHMS1720992-supplement-1.pdf [file NIHMS1720992-supplement-1.pdf]
